# Supplementary material
Source: PubMed Central journal article supplement (PMC3122192)
Supplement: supp_C111.245597_jbc.C111.245597-1.pdf [file supp_C111.245597_jbc.C111.245597-1.pdf]

Supplement 1.

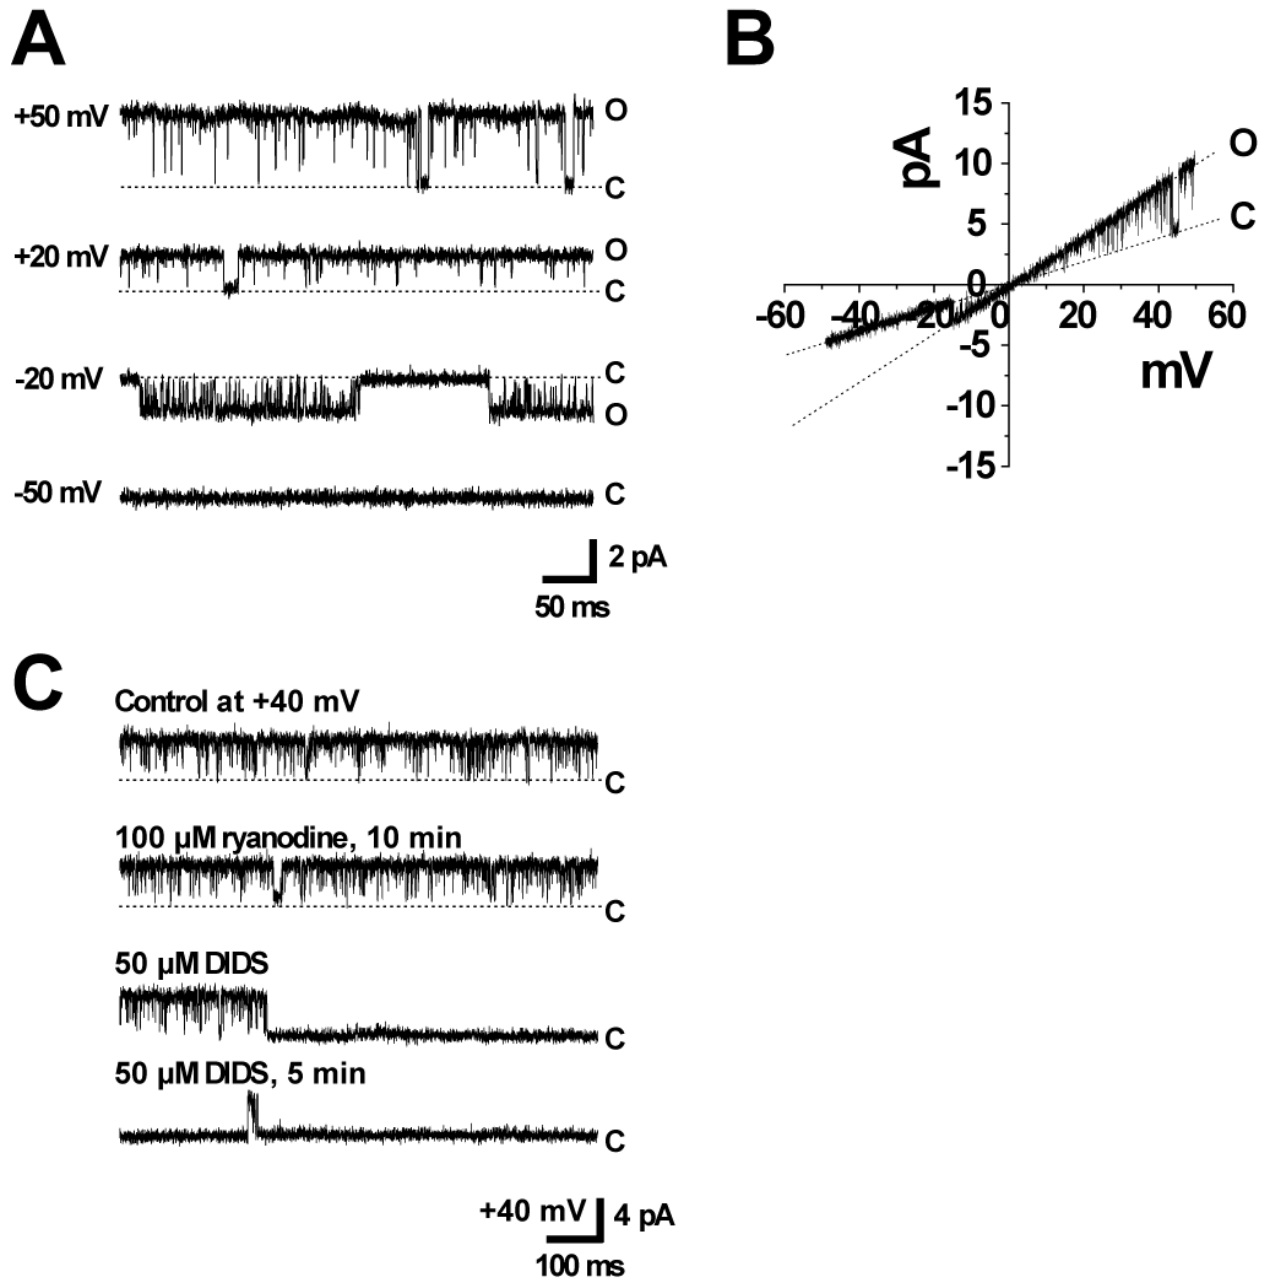

**Supplement 1.** Effect of ryanodine on the ~100 pS conductance channel activity. **A.** Current traces of mitochondrial Centum picoSiemen conductance channel (mCS) activity recorded at indicated voltages. **B.** Current to voltage relationship recorded from a ramp voltage protocol at  $\pm 50$  mV. **C.** Effect of 100  $\mu$ M ryanodine and 50  $\mu$ M DIDS on mCS channel activity. 'C' and 'O' indicate closed and open states, respectively. Recording conditions are identical as in Fig. 1.
