# Supplementary material
Source: PubMed Central journal article supplement (PMC3122192)
Supplement: supp_C111.245597_jbc.C111.245597-2.pdf [file supp_C111.245597_jbc.C111.245597-2.pdf]

Supplement 2.

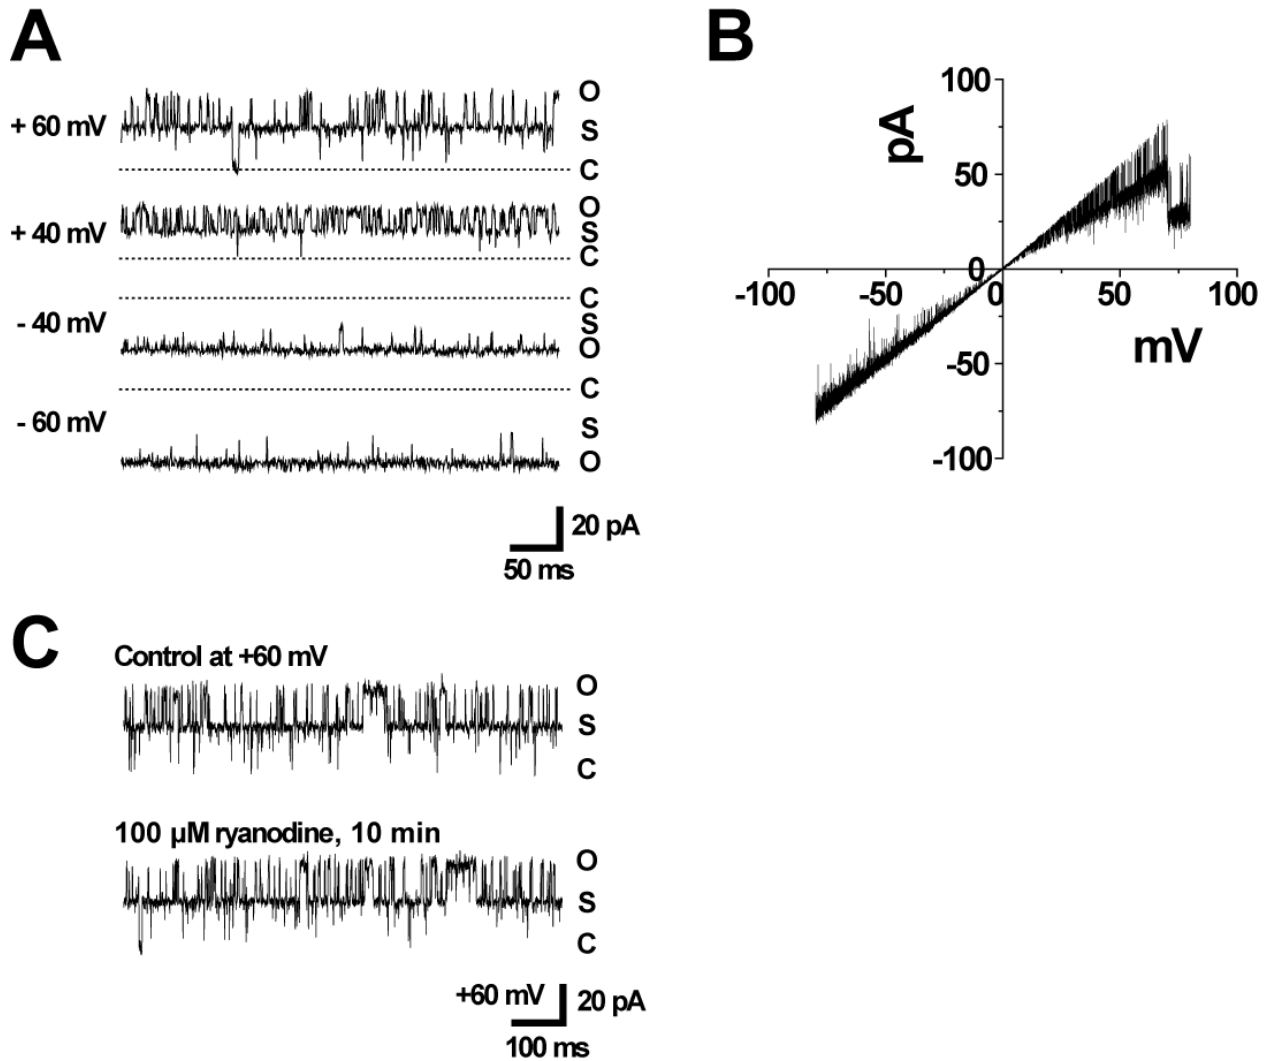

**Supplement 2.** Effect of ryanodine on the  $\sim$ 700 pS conductance channel activity. **A.** Current traces of translocase of inner membrane (TIM23) channel activity at indicated voltages. **B.** Current to voltage relationship recorded from a voltage ramp protocol at  $\pm$ 80 mV. **C.** Effect of 100  $\mu$ M ryanodine on TIM23 channel activity. 'C', 'O', and 'S' indicate closed, open, and subconductance states, respectively. Recording conditions are identical as in Fig. 1.
