# Supplementary material
Source: PubMed Central journal article supplement (PMC3122192)
Supplement: supp_C111.245597_jbc.C111.245597-3.pdf [file supp_C111.245597_jbc.C111.245597-3.pdf]

Supplement 3.

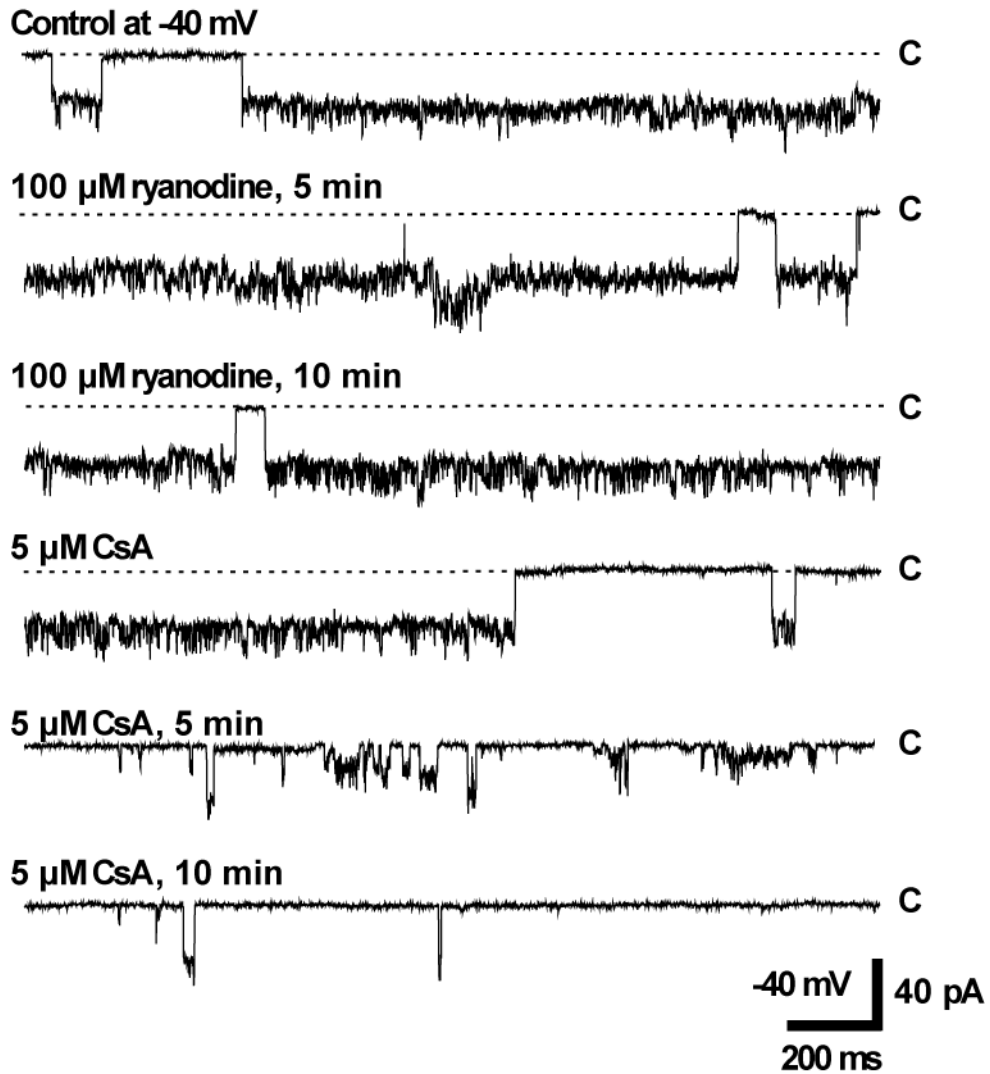

**Supplement 3.** Effect of ryanodine on the ~1000 pS conductance channel (mPTP) activity. Current traces before and after 100 μM ryanodine and 5 μM cyclosporin A (CsA) additions. 'C' and 'O' indicate closed and open state. Recording conditions are identical as in Fig. 1.
